# Supplementary material
Source: PubMed Central journal article supplement (PMC6796923)
Supplement: 41422_2019_155_MOESM1_ESM.pdf [file 41422_2019_155_MOESM1_ESM.pdf]

Supplementary information, Fig. S1

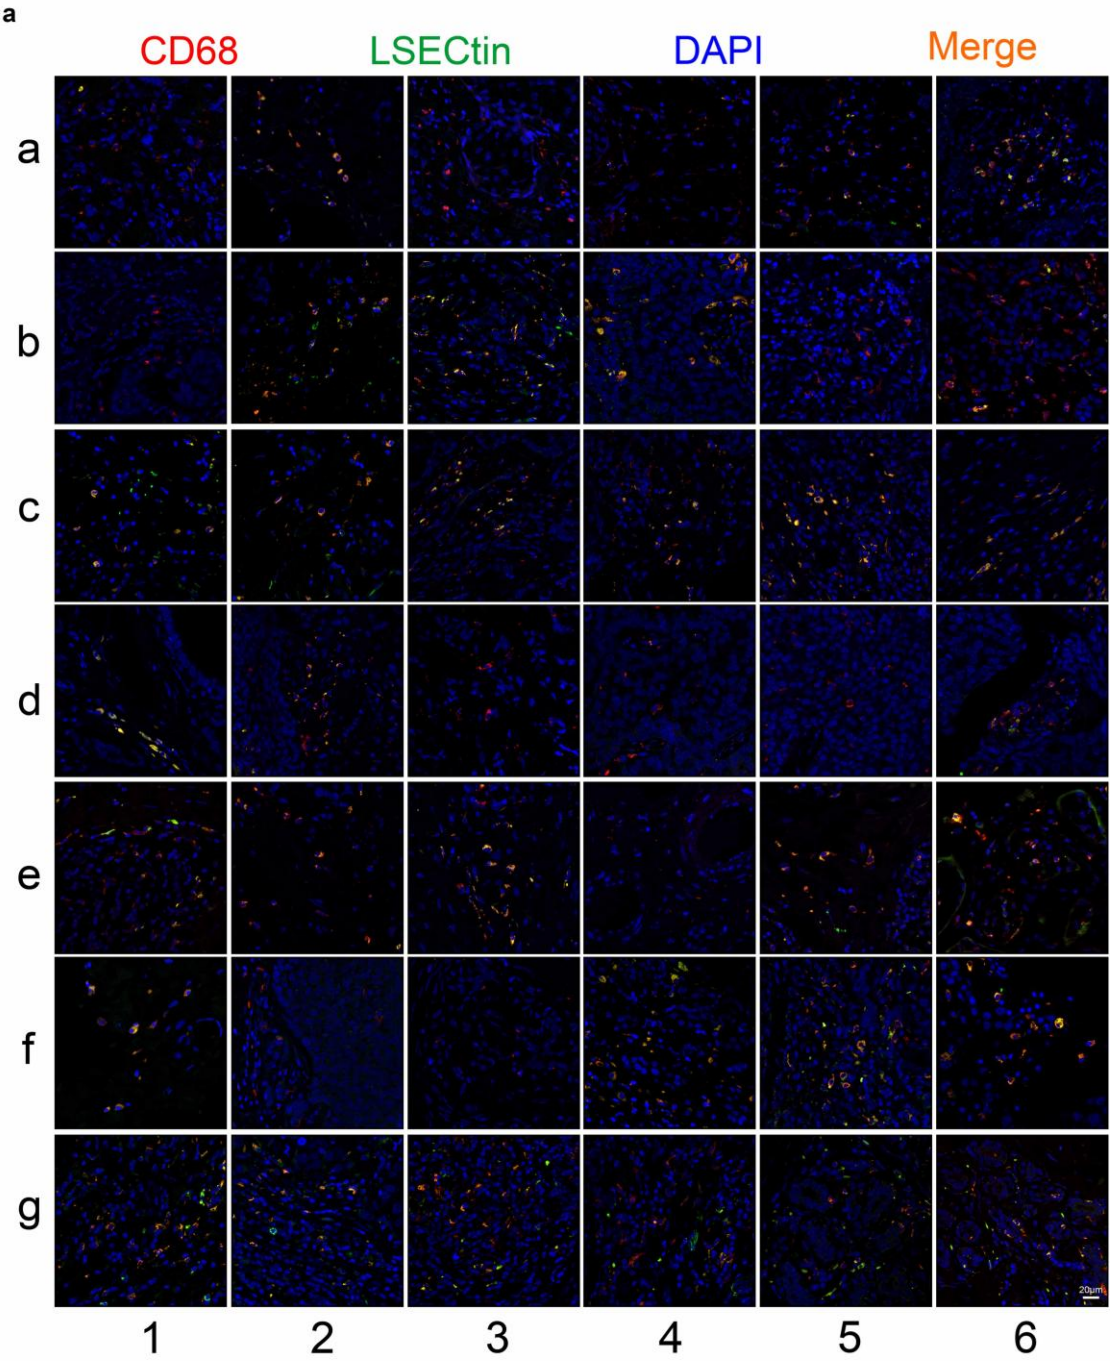

**b**

|           | LSEctin-positive samples | LSEctin/CD68 merge samples |
|-----------|--------------------------|----------------------------|
| Luminal A | 6/10 (60%)               | 5/10 (50%)                 |
| Luminal B | 10/14 (71%)              | 10/14 (71%)                |
| HER2+     | 7/10 (70%)               | 7/10 (70%)                 |
| TNBC      | 8/8 (100%)               | 8/8 (100%)                 |
| Total     | 31/42 (74%)              | 30/42 (71%)                |

**c**

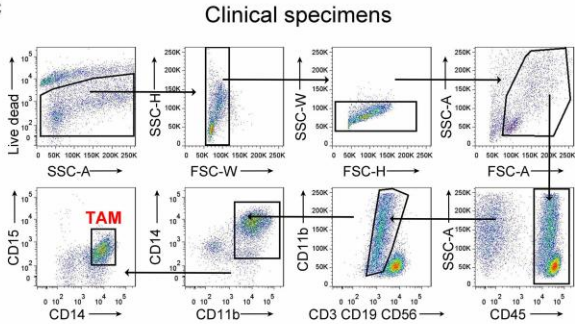

**d**

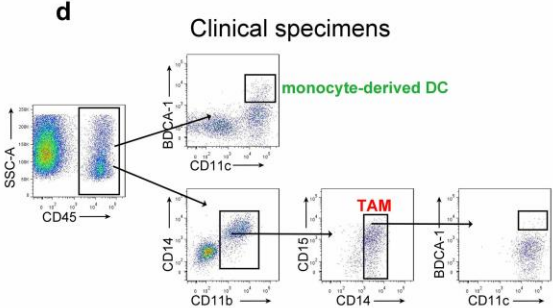

**e**

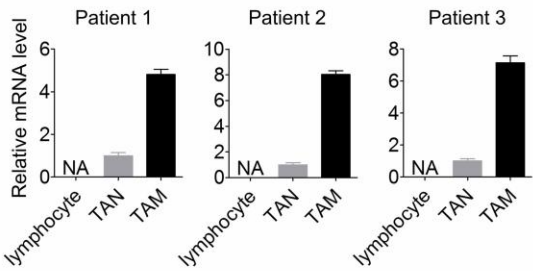

**f**

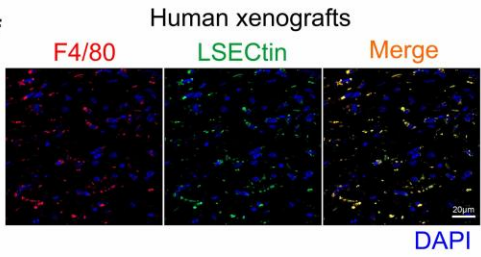

**g**

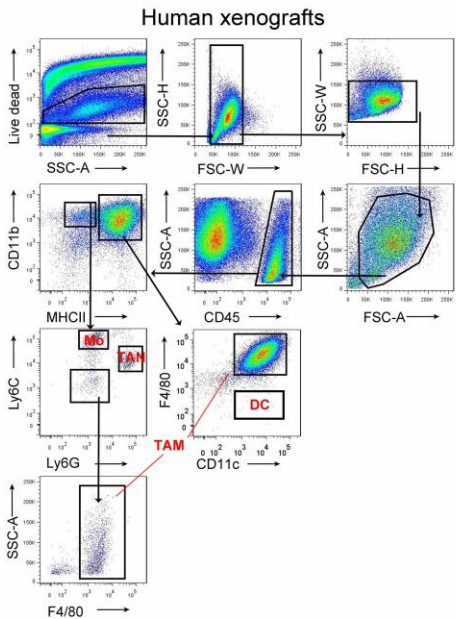

**h**

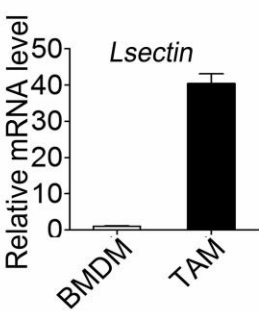

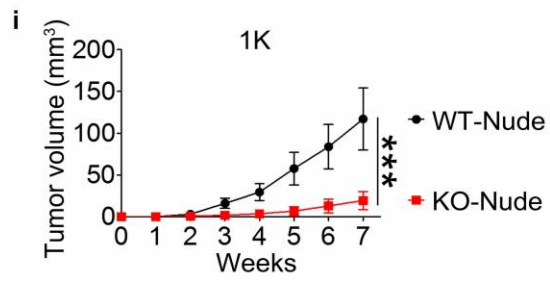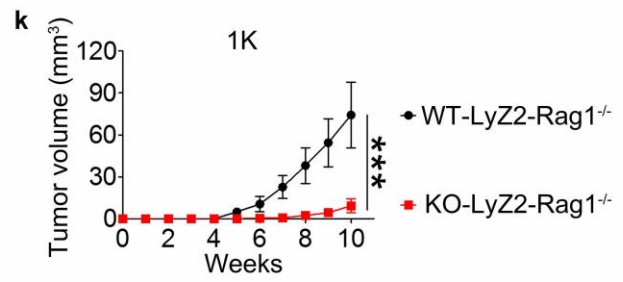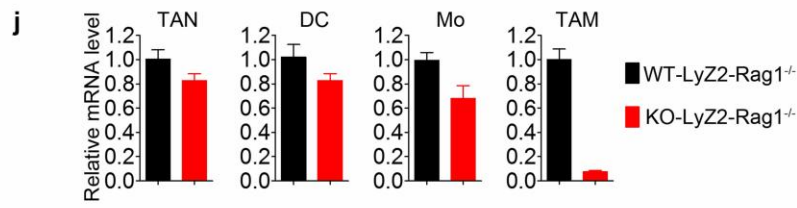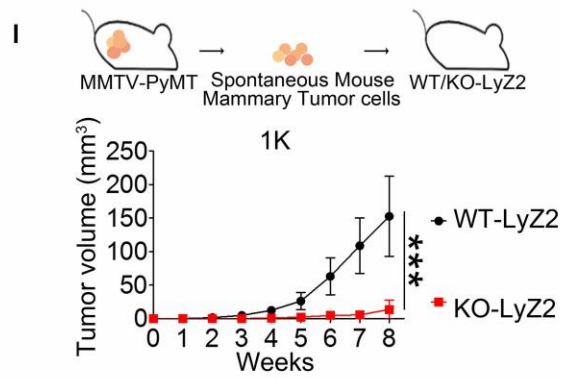

| Group   | 100K           | 1K            |
|---------|----------------|---------------|
| WT-LyZ2 | 8/9<br>(89%)   | 5/10<br>(50%) |
| KO-LyZ2 | 10/11<br>(91%) | 1/10<br>(10%) |

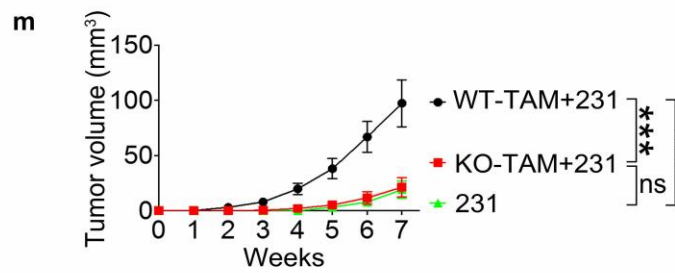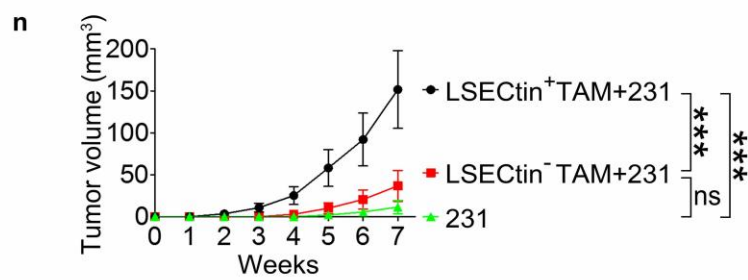

## Supplementary information, Fig. S1. LSECtin expressed on macrophages drives breast cancer growth

- (a) Immunofluorescent staining of tumor tissues representing different types of breast cancer for CD68 (red) and LSECtin (green). A high proportion of CD68-positive cells are LSECtin-positive (scale bar=20  $\mu$ m). Details regarding the tumor pathology are presented in Supplementary information, Table S1.
- (b) The number and percentage of samples containing LSECtin and CD68 co-expressing cells in tumor sections from 42 breast cancer patients.
- (c) Gating strategy for the identification of TAMs in the tumor tissues of different patients.
- (d) Gating strategy for the identification of TAMs and monocyte-derived DCs. TAM subpopulation scarcely contains monocyte-derived DCs.
- (e) Real-time PCR analysis showing the expression of *Lsectin* relative to that of the housekeeping gene  $\beta$ -actin in TAMs from breast cancer patients (3 pieces of tumor tissues for each patient). One of three experiments is shown.
- (f) Immunofluorescent staining of human xenograft tumors for F4/80 (red) or LSECtin (green). A high proportion of F4/80-positive cells are LSECtin-positive (scale bar = 20  $\mu$ m). One of three experiments is shown.
- (g) Flow cytometric analysis on different myeloid cell populations showing the gating strategy for the identification of tumor-associated macrophages (TAM), tumor-associated neutrophils (TAN), monocytes (Mo) and dendritic cells (DC) in human xenograft tumors.
- (h) Mouse Bone marrow-derived macrophages (BMDMs) or tumor extract solution educated BMDMs (induced TAMs) were used for real-time PCR analysis.  $\beta$ -actin served as a control. The levels of *Lsectin* were up-regulated in BMDMs after stimulation by tumor extract solution. One of three experiments is shown.
- (i,k)  $1 \times 10^3$  231 cells were injected into KO-Nude mice or littermate controls (n=15 each) (i); into KO-LyZ2-Rag1<sup>-/-</sup> mice (n=20) or littermate controls (n=23) (k). The tumor volume was monitored weekly.
- (j) Real-time PCR analysis showing the expression of *Lsectin* relative to that of the housekeeping gene  $\beta$ -actin in TAN, DC, Mo or TAM from WT- LyZ2-Rag1<sup>-/-</sup> or KO-LyZ2-Rag1<sup>-/-</sup> models. The data from three mice were pooled.
- (l) LSECtin specific knockout of TAMs delays tumor growth in the immunocompetent mouse allograft models. Primary mouse tumor cells were isolated from MMTV-PyMT mice and injected into macrophage-specific LSECtin knockout mice (LyZ2-Cre; LSECtin<sup>fl/fl</sup>; KO-LyZ2 in short) or littermate controls (LSECtin<sup>fl/fl</sup>; WT-LyZ2 in short). The tumor volume at 7 weeks after injection of  $10^3$  tumor cells is shown (left) (n=10 each). The table indicates the number of tumors initiated (right).

(m,n)  $1 \times 10^3$  231 cells were injected with admixed  $1 \times 10^4$  WT-TAMs or with admixed KO-TAMs (m); with admixed human primary LSECtin<sup>-</sup>TAMs or with admixed LSECtin<sup>+</sup>TAMs from surgical breast cancer specimens (n) into KO-Nude mice. The tumor volume of KO-nude mice injected with  $1 \times 10^3$  231 cells without admixed TAMs served as controls. The tumor volume was monitored weekly. One of three experiments is shown.

Data are presented as the mean  $\pm$  SEM. \* $P < 0.05$ , \*\* $P < 0.01$ , \*\*\* $P < 0.001$  (two-way ANOVA test for i, k, h, l, m, n).
