# Supplementary material
Source: PubMed Central journal article supplement (PMC6796923)
Supplement: 41422_2019_155_MOESM5_ESM.pdf [file 41422_2019_155_MOESM5_ESM.pdf]

Supplementary information, Fig. S5

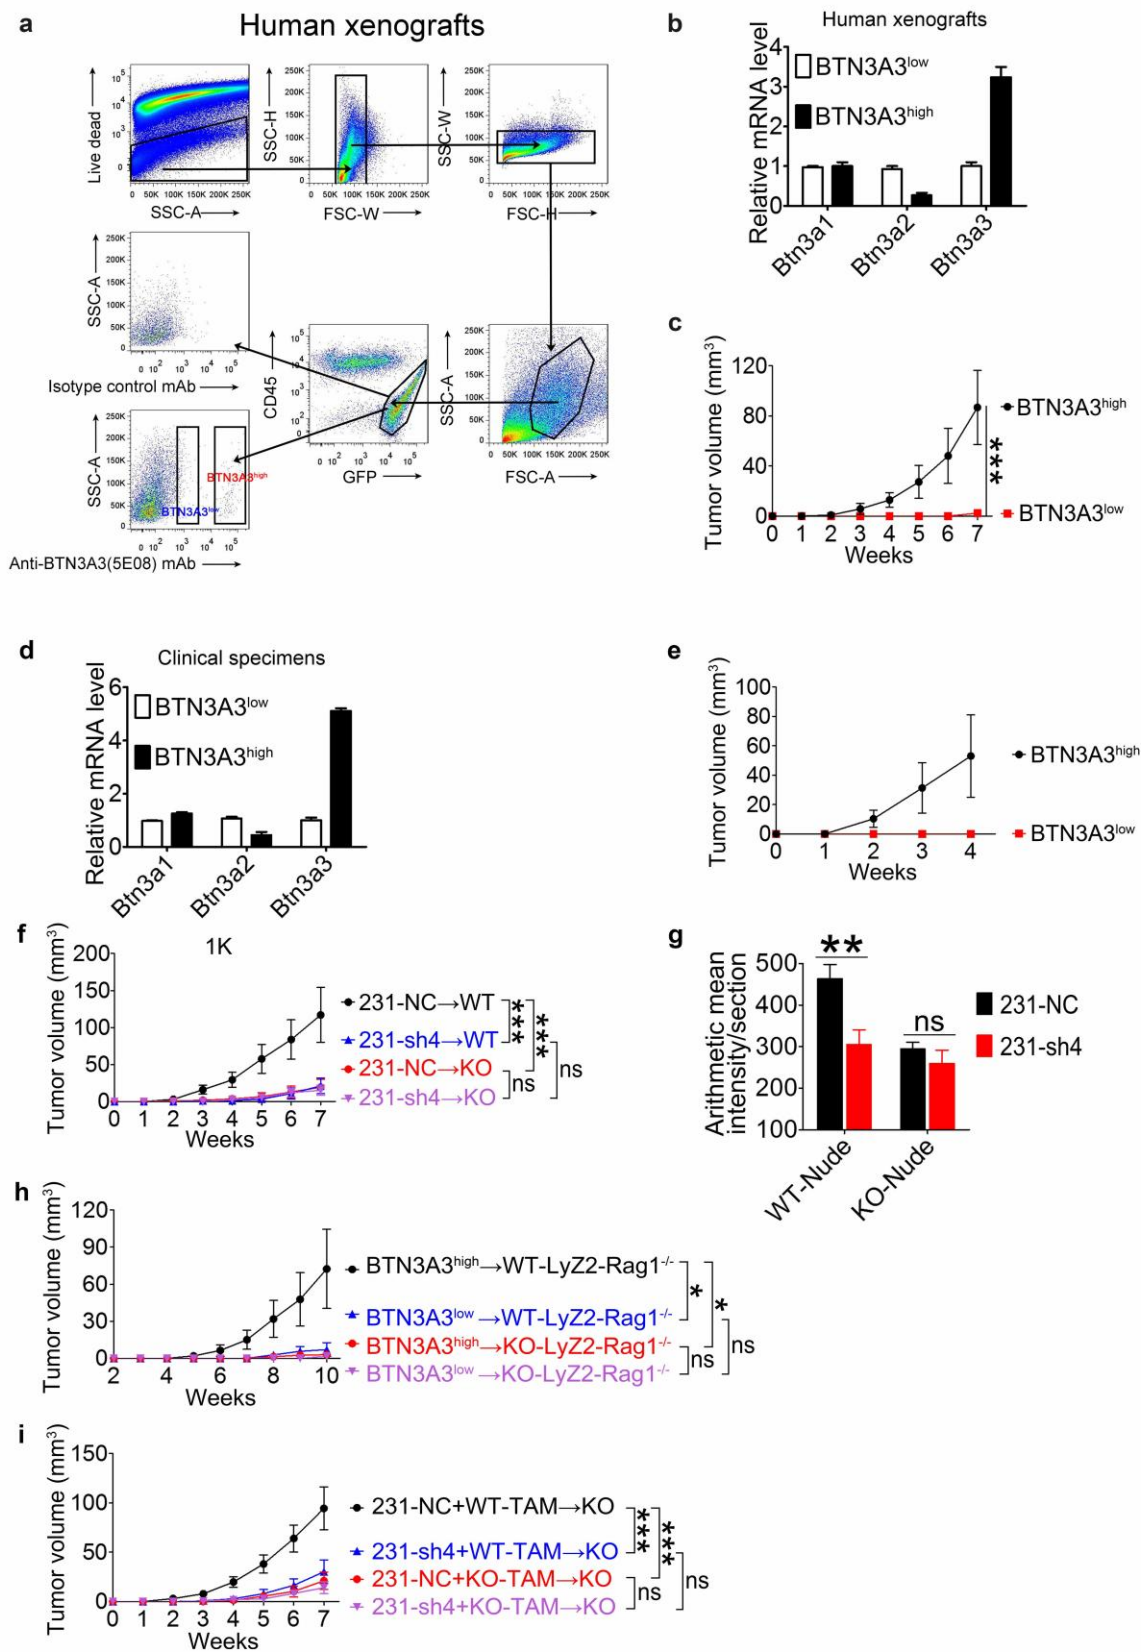

**Supplementary information, Fig. S5. The LSECTin-BTN3A3 axis promotes breast cancer tumor growth *in vivo***

- (a) Gating strategy for the identification of tumor populations of BTN3A3<sup>high</sup> and BTN3A3<sup>low</sup> tumor cells in human xenograft tumors formed by 231-NC cells. The GFP-positive cells were tumor cells.
- (b,d) Real-time PCR analysis showing the expression of *Btn3a1*, *Btn3a2*, *Btn3a3* relative to that of the housekeeping gene  $\beta$ -actin in BTN3A3<sup>high</sup> cells and BTN3A3<sup>low</sup> cells from human xenograft tumors (b) or clinical specimens (d). One of two experiments is shown.
- (c,e)  $1 \times 10^3$  BTN3A3<sup>high</sup> cells or BTN3A3<sup>low</sup> cells from human xenograft tumors (c) or clinical specimens (e) were injected into WT-Nude mice (n=10 each). Tumor volumes were monitored weekly (c) or monthly (e). One of two experiments is shown.
- (f)  $1 \times 10^3$  231-NC or 231-sh4 cells were injected into KO-nude mice or littermate controls (n=15 each). Tumor volumes were monitored weekly. One of two experiments is shown.
- (g) Immunofluorescent staining of tumor tissues for human CD90 in the human xenograft tumors formed by 231-NC and 231-sh4 cells. The anti-human CD90 antibody without reactivity with mouse CD90 were used in the immunofluorescence analysis. The arithmetic mean of CD90 immunofluorescent staining intensity are shown.
- (h)  $1 \times 10^3$  BTN3A3<sup>high</sup> cells or BTN3A3<sup>low</sup> cells from human xenograft tumors were injected into KO-LyZ2-Rag1<sup>-/-</sup> mice or littermate controls (n=10 each). Tumor volume was monitored weekly. One of two experiments is shown.
- (i) An admixture of  $1 \times 10^3$  231-NC or 231-sh4 cells and  $1 \times 10^4$  WT-TAMs or KO-TAMs were injected into KO-Nude mice (n=20 each). Tumor volume was monitored weekly. One of two experiments is shown.

\* $P < 0.05$ , \*\* $P < 0.01$ , \*\*\* $P < 0.001$  (two-way ANOVA test for c, f, h, i; unpaired Student's t test for g).
