# Supplementary material
Source: PubMed Central journal article supplement (PMC6796923)
Supplement: 41422_2019_155_MOESM7_ESM.pdf [file 41422_2019_155_MOESM7_ESM.pdf]

Supplementary information, Fig. S7

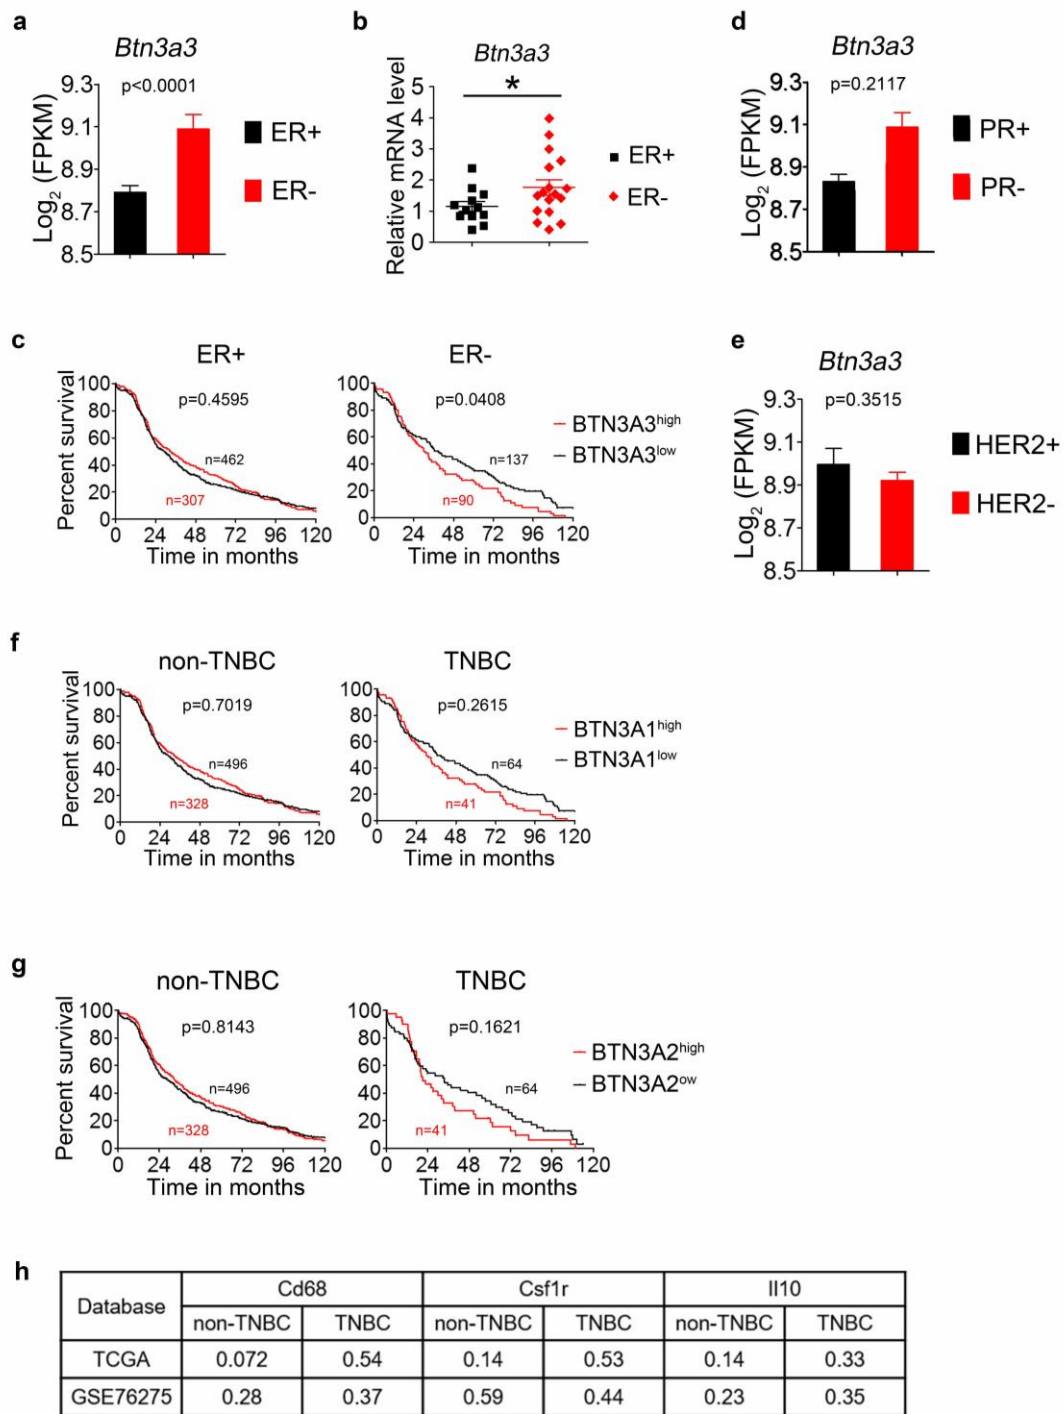

**Supplementary information, Fig. S7. Signatures of BTN3A3 and LSECTin abundance in the breast cancer**

- (a) *Btn3a3* mRNA expression in ER<sup>+</sup> and ER<sup>-</sup> samples from the TCGA data set (ER<sup>+</sup> n = 769; ER<sup>-</sup> n = 227).
- (b) Real-time PCR analysis showing *Btn3a3* expression with cDNAs from ER<sup>+</sup> patients (n=12, black) and ER<sup>-</sup> patients (n = 17, red) as templates.
- (c) Kaplan-Meier survival curve of breast cancer patients from the TCGA data set (For ER<sup>+</sup> samples, BTN3A3<sup>low</sup>: 60%, n = 462, BTN3A3<sup>high</sup>: 40%, n = 307; for ER<sup>-</sup> samples, BTN3A3<sup>low</sup>: 60%, n = 137, BTN3A3<sup>high</sup>: 40%, n = 90).
- (d) *Btn3a3* mRNA expression in PR<sup>+</sup> and PR<sup>-</sup> samples from the TCGA data set (PR<sup>+</sup> n = 667; PR<sup>-</sup> n = 325).
- (e) *Btn3a3* mRNA expression in HER2<sup>+</sup> and HER2<sup>-</sup> samples from the TCGA data set (HER2<sup>+</sup> n = 156; HER2<sup>-</sup> n = 537).
- (f,g) Kaplan-Meier survival curve of breast cancer patients from the TCGA data set (For non-TNBC samples, BTN3A1<sup>low</sup>/BTN3A2<sup>low</sup>: 60%, n = 496, BTN3A1<sup>high</sup>/BTN3A2<sup>high</sup>: 40%, n = 328; for TNBC samples, BTN3A1<sup>low</sup>/BTN3A2<sup>low</sup>: 60%, n = 64, BTN3A1<sup>high</sup>/BTN3A2<sup>high</sup>: 40%, n = 41).
- (h) Correlation between *Lsectin* expression and TAM-associated gene expression in human breast cancer samples from the TCGA data set (non-TNBC n = 824; TNBC n = 105), GSE76275 (non-TNBC n = 198; TNBC n = 65).

Data are presented as the mean  $\pm$  SD. \* $P < 0.05$ , \*\* $P < 0.01$ , \*\*\* $P < 0.001$  (unpaired Student's t test for a, b, d, e).
