# Supplementary material
Source: PubMed Central journal article supplement (PMC6796923)
Supplement: 41422_2019_155_MOESM8_ESM.pdf [file 41422_2019_155_MOESM8_ESM.pdf]

**Supplementary information, Table S1. Paraffin-embedded breast cancer patient biopsies analyzed for co-expression of LSECTin and CD68 by immunofluorescence staining.**

| Patient number | Gender | Age | Classification | Stage | ER | PR | Her2 | Coefficient |
|----------------|--------|-----|----------------|-------|----|----|------|-------------|
| a1             | female | 64  | Luminal A      | II    | +  | -  | -    | 0.36        |
| a2             | female | 49  | Luminal A      | II    | +  | +  | -    | 0.84        |
| a3             | female | 47  | Luminal A      | III   | +  | -  | -    | 0.17        |
| a4             | female | 66  | Luminal A      | II    | +  | +  | -    | 0.80        |
| a5             | female | 43  | Luminal A      | III   | +  | +  | -    | 0.72        |
| a6             | female | 40  | Luminal A      | II    | +  | +  | -    | 0.83        |
| b1             | female | 51  | Luminal A      | III   | +  | +  | -    | 0           |
| b2             | female | 56  | Luminal A      | III   | +  | +  | -    | 0.64        |
| b3             | female | 54  | Luminal A      | III   | +  | -  | -    | 0.21        |
| b4             | female | 45  | Luminal A      | II    | +  | +  | -    | 0.88        |
| b5             | female | 48  | Luminal B      | II    | +  | +  | -    | 0.45        |
| b6             | female | 54  | Luminal B      | III   | +  | -  | +    | 0.79        |
| c1             | female | 44  | Luminal B      | III   | +  | +  | +    | 0.90        |
| c2             | female | 52  | Luminal B      | III   | +  | +  | +    | 0.85        |
| c3             | female | 51  | Luminal B      | II    | +  | -  | +    | 0.83        |
| c4             | female | 46  | Luminal B      | III   | +  | -  | +    | 0.75        |
| c5             | female | 61  | Luminal B      | II    | +  | -  | +    | 0.80        |
| c6             | female | 41  | Luminal B      | II    | +  | +  | +    | 0.68        |
| d1             | female | 49  | Luminal B      | II    | +  | +  | +    | 0.93        |
| d2             | female | 56  | Luminal B      | III   | +  | +  | +    | 0.83        |
| d3             | female | 51  | Luminal B      | II    | +  | -  | +    | 0.17        |
| d4             | female | 48  | Luminal B      | II    | +  | +  | +    | 0.52        |
| d5             | female | 41  | Luminal B      | II    | +  | +  | +    | 0           |
| d6             | female | 76  | Luminal B      | III   | +  | +  | +    | 0.67        |
| e1             | female | 41  | HER2+          | III   | -  | -  | +    | 0.84        |
| e2             | female | 54  | HER2+          | III   | -  | -  | +    | 0.76        |
| e3             | female | 28  | HER2+          | III   | -  | -  | +    | 0.73        |
| e4             | female | 61  | HER2+          | III   | -  | -  | +    | 0.69        |
| e5             | female | 49  | HER2+          | II    | -  | -  | +    | 0.84        |
| e6             | female | 65  | HER2+          | III   | -  | -  | +    | 0.36        |
| f1             | female | 45  | HER2+          | III   | -  | -  | +    | 0.74        |
| f2             | female | 53  | HER2+          | III   | -  | -  | +    | 0.2         |
| f3             | female | 48  | HER2+          | II    | -  | -  | +    | 0.84        |
| f4             | female | 61  | HER2+          | III   | -  | -  | +    | 0.92        |
| f5             | female | 63  | TNBC           | II    | -  | -  | -    | 0.79        |
| f6             | female | 43  | TNBC           | III   | -  | -  | -    | 0.92        |
| g1             | female | 46  | TNBC           | III   | -  | -  | -    | 0.86        |
| g2             | female | 58  | TNBC           | II    | -  | -  | -    | 0.94        |
| g3             | female | 43  | TNBC           | II    | -  | -  | -    | 0.90        |
| g4             | female | 63  | TNBC           | II    | -  | -  | -    | 0.79        |

|    |        |    |      |     |   |   |   |      |
|----|--------|----|------|-----|---|---|---|------|
| g5 | female | 46 | TNBC | III | - | - | - | 0.87 |
| g6 | female | 44 | TNBC | II  | - | - | - | 0.89 |
