# Supplementary material
Source: PubMed Central journal article supplement (PMC6796923)
Supplement: 41422_2019_155_MOESM9_ESM.pdf [file 41422_2019_155_MOESM9_ESM.pdf]

**Supplementary information, Table S2. Paraffin-embedded breast cancer patient biopsies.**

| <b>Patient number</b> | <b>Gender</b> | <b>Age</b> | <b>Classification</b> | <b>Stage</b> | <b>ER</b> | <b>PR</b> | <b>Her2</b> |
|-----------------------|---------------|------------|-----------------------|--------------|-----------|-----------|-------------|
| Patient A             | female        | 66         | Luminal A             | II           | +         | +         | -           |
| Patient B             | female        | 41         | Luminal B             | II           | +         | +         | +           |
| Patient C             | female        | 58         | TNBC                  | II           | -         | -         | -           |
