# Supplementary material
Source: PubMed Central journal article supplement (PMC6796923)
Supplement: 41422_2019_155_MOESM10_ESM.pdf [file 41422_2019_155_MOESM10_ESM.pdf]

**Supplementary information, Table S3. Fresh surgical breast cancer patient biopsies analyzed for LSECTin surface expression by TAMs and BTN3A3 surface expression by tumor cells.**

| <b>Patient number</b> | <b>Gender</b> | <b>Age</b> | <b>Stage</b> | <b>ER</b> | <b>PR</b> | <b>Her2</b> | <b>LSECTin expression on TAMs (%)</b> | <b>BTN3A3 expression on BCCs (%)</b> |
|-----------------------|---------------|------------|--------------|-----------|-----------|-------------|---------------------------------------|--------------------------------------|
| 1                     | female        | 42         | II           | +         | +         | +           | 58.6                                  | 33.30                                |
| 2                     | female        | 45         | II           | +         | +         | +           | 72.4                                  | 12.20                                |
| 3                     | female        | 46         | III          | +         | -         | +           | 62.7                                  | 20.50                                |
| 4                     | female        | 48         | II           | +         | +         | -           | 78.1                                  | 22.61                                |
| 5                     | female        | 48         | III          | -         | -         | +           | 66.7                                  | 14.75                                |
| 6                     | female        | 62         | II           | +         | -         | -           | 45.6                                  | 45.50                                |
| 7                     | female        | 50         | II           | +         | +         | -           | 55.7                                  | 28.21                                |
| 8                     | female        | 71         | I            | +         | -         | -           | 56.1                                  | 53.19                                |
| 9                     | female        | 58         | I            | +         | +         | -           | 41.2                                  | 35.51                                |
| 10                    | female        | 55         | II           | +         | +         | -           | 35.2                                  | 37.99                                |
