# Supplementary material
Source: PubMed Central journal article supplement (PMC6796923)
Supplement: 41422_2019_155_MOESM11_ESM.pdf [file 41422_2019_155_MOESM11_ESM.pdf]

**Supplementary information, Table S4. Paraffin-embedded breast cancer patient biopsies analyzed for co-expression of BTN3A3, CD31 and CD45 by immunofluorescence staining.**

| <b>Patient number</b> | <b>Gender</b> | <b>Age</b> | <b>Classification</b> | <b>Stage</b> | <b>ER</b> | <b>PR</b> | <b>Her2</b> |
|-----------------------|---------------|------------|-----------------------|--------------|-----------|-----------|-------------|
| a1                    | female        | 50         | Luminal A             | III          | +         | +         | -           |
| a2                    | female        | 49         | Luminal A             | II           | +         | +         | -           |
| a3                    | female        | 47         | Luminal A             | III          | +         | -         | -           |
| a4                    | female        | 66         | Luminal A             | II           | +         | +         | -           |
| a5                    | female        | 40         | Luminal A             | II           | +         | +         | -           |
| a6                    | female        | 51         | Luminal A             | III          | +         | +         | -           |
| b1                    | female        | 56         | Luminal A             | III          | +         | +         | -           |
| b2                    | female        | 44         | Luminal B             | III          | +         | +         | +           |
| b3                    | female        | 61         | Luminal B             | III          | +         | -         | +           |
| b4                    | female        | 61         | Luminal B             | III          | +         | -         | +           |
| b5                    | female        | 46         | Luminal B             | III          | +         | -         | +           |
| b6                    | female        | 61         | Luminal B             | II           | +         | -         | +           |
| c1                    | female        | 76         | Luminal B             | III          | +         | +         | +           |
| c2                    | female        | 54         | Luminal B             | III          | +         | -         | +           |
| c3                    | female        | 41         | Luminal B             | II           | +         | +         | +           |
| c4                    | female        | 49         | Luminal B             | II           | +         | +         | +           |
| c5                    | female        | 63         | HER2+                 | II           | +         | -         | +           |
| c6                    | female        | 43         | HER2+                 | III          | +         | +         | +           |
| d1                    | female        | 41         | HER2+                 | III          | -         | -         | +           |
| d2                    | female        | 54         | HER2+                 | III          | -         | -         | +           |
| d3                    | female        | 28         | HER2+                 | III          | -         | -         | +           |
| d4                    | female        | 61         | HER2+                 | III          | -         | -         | +           |
| d5                    | female        | 53         | HER2+                 | III          | -         | -         | +           |
| d6                    | female        | 48         | HER2+                 | II           | -         | -         | +           |
| e1                    | female        | 46         | TNBC                  | III          | -         | -         | -           |
| e2                    | female        | 58         | TNBC                  | II           | -         | -         | -           |
| e3                    | female        | 43         | TNBC                  | II           | -         | -         | -           |
| e4                    | female        | 63         | TNBC                  | II           | -         | -         | -           |
| e5                    | female        | 46         | TNBC                  | III          | -         | -         | -           |
| e6                    | female        | 44         | TNBC                  | II           | -         | -         | -           |
