# Supplementary material
Source: PubMed Central journal article supplement (PMC6796923)
Supplement: 41422_2019_155_MOESM12_ESM.pdf [file 41422_2019_155_MOESM12_ESM.pdf]

## **Supplementary information, Data S1. Detailed methods**

### **Tumor growth and treatments**

In the tumor growth experiments, the cells were suspended in 10  $\mu$ l of a 1:1 DMEM (Hyclone) and growth factor-reduced Matrigel (BD bioscience) mixture and injected into the mammary fat pads of 6-week-old female nude mice or Rag1-knockout mice. In co-injection experiments, the amount of growth factor-reduced Matrigel was reduced to minimize any effects of growth factors from the growth factor-reduced Matrigel, as described in the previous report <sup>1</sup>. Thus, the cells were suspended in 10  $\mu$ l of a 4:1 DMEM and growth factor-reduced Matrigel mixture and injected into the mice. MDA-MB-231 cells were co-injected with primary TAMs at a ratio 1:10. For prophylactic treatment,  $1 \times 10^4$  tumor cells were injected into the breast fat pad of mice. These mice were then allocated to different experimental groups randomly and treated by 10  $\mu$ g control-IgG, BTN3A3-Fc, BTN3A1-Fc or 50  $\mu$ g isotype control mAb, anti-BTN3A3 (5E08) mAb i.p. every three days. For anti-BTN3A3 treatment,  $1 \times 10^5$  tumor cells were injected into the breast fat pad of mice. The tumor volume was calculated. The mice were divided into groups with equal tumor volume and treated by intratumoral injection with 50  $\mu$ g isotype control IgG or anti-BTN3A3 (5E08) mAb every three days. For measurement, single tumors were measured weekly using a caliper. The tumor volume was calculated using the equation  $(L \times W^2) \times 0.52$  where “L”=length and “W”=width (measured by two observers blinded to the group allocation).

### **Flow cytometry analysis and cell sorting**

For sorting or analysis of tumor cells and tumor infiltrating myeloid cells, stained cells were analyzed on LSR Fortessa (BD Biosciences) and were sorted on FACS Aria III (BD Biosciences) with routinely 95% cell sorting purity. For mouse tumor infiltrating myeloid cells analysis, single-cell suspensions from breast tumors were stained with anti-CD45 FITC, anti-CD11b PE-Cy7, anti-MHC II PE, anti-Ly6C APC, anti-Ly6G APC-Cy7, F4/80 APC-R700, anti-CD11c BV421 in PBS containing 0.2% BSA after

pre-incubated with anti-mouse CD16/CD32 antibody. For sorting BTN3A3<sup>high</sup> or BTN3A3<sup>low</sup> tumor cells from human xenografts, single-cell suspensions from breast tumors were stained with anti-mouse IgG PE, in PBS containing 0.2% BSA, following incubation with anti-BTN3A3 (5E08) or isotype control for 30 min at 4°C temperature after pre-incubated with anti-mouse CD16/CD32 antibody and human Fc inhibitor (eBioscience). The GFP<sup>+</sup> cells were divide to BTN3A3<sup>high</sup> or BTN3A3<sup>low</sup> tumor cells. For human tumor infiltrating myeloid cells and tumor cells, single-cell suspensions from surgical specimens were stained with isotype control, anti-BTN3A3 (5E08) or anti-LSEctin (CCB059) in PBS containing 0.2% BSA after pre-incubated with human Fc inhibitor, then were incubated with anti-mouse IgG APC. Single-cell suspensions were then stained with anti-CD45 PE, anti-CD31 PE, anti-CD3 FITC, anti-CD19 FITC, anti-CD56 FITC, anti-CD11b PE-Cy7, anti-CD14 V500, anti-CD15 PE-CY594, anti-CD11c BV421, anti-BDCA-1 PerCP-Cyanine5.5. Before sorting, single-cell suspensions were stained with Fixable Viability Dye (eBioscience) to distinguish live cells. The Median Fluorescence Intensity (MFI) less the MFI of isotype control equals the DeltaMFI.

### **Immunofluorescence staining**

Immunofluorescence staining analysis of LSEctin, BTN3A3, CD68, CD45, CD31 and CD90 expression in tumor biopsies obtained from breast cancer patients or human xenografts were done as described previously <sup>1, 2</sup>. Briefly, 5 µm thick tumor biopsy sections were deparaffinized in xylene and subsequently rehydrated with 100%, 95%, and 75% ethanol, and deionized H<sub>2</sub>O. Sections were then placed in antigen-retrieval solution (10 mM sodium citrate, pH 6.0) and boiled 3 min, and then cooled down to room temperature. Subsequently, sections were stained with 1:200 dilution of secondary antibody at room temperature for 30 minutes, following incubation with a 1:100 dilution of goat IgG for 1 hour at room temperature and stained with dilution of anti-LSEctin, anti-CD68, anti-BTN3A3, anti-CD45, anti-CD31, or anti-CD90 antibodies overnight at 4°C. Before analysis the sections were stained with the

fluorescent dye 4'-6-diamidino-2-phenylindole (DAPI) at room temperature for 5 minutes. LSEctin, BTN3A3, CD68, CD45, CD31 and CD90 expression were detected and analyzed using the Zeiss LSM800. The overlap coefficient ( $>0.65$ ) showed co-localization of LSEctin and CD68 in the clinical specimens.

### **Co-culture of breast cancer cells with macrophages**

In co-culture system with cell-cell contact fashion, 231-NC or 231-sh4 cells were mixed with primary TAMs or THP-1 cell lines at a 1:10 ratio under mammosphere conditions (low-adhesion plate, mammosphere medium described above). In the transwell co-culture system, primary TAMs or THP-1 cell lines were seeded in the transwell insert membrane (with pores of 0.4  $\mu\text{m}$  diameter, Corning). After 1 day culture, tumor cells with GFP were sorted by FACS. The collected cells were extracted RNA for analysis of stemness-related TFs expression.

### **Adhesion assay**

At 30 hours post-transfection, the culture medium was aspirated and the transfected monolayers were washed with DMEM. The cells were then digested by the trypsin (37  $^{\circ}\text{C}$ , 2 minutes). Digestion was terminated by DMEM with 10% fetal bovine serum before wash twice by the DMEM. The cells was first incubated by the LSEctin-Fc protein at different concentration using DMEM with 3% fetal bovine serum, wash at least three times. For the anti- LSEctin mAb blockade, LSEctin-Fc recombinant protein at 2  $\mu\text{g}/\text{ml}$  was pre-incubated with anti-Human LSEctin mAb (Abcam) or isotype control IgG (Abcam) on ice, 60 minutes. For the BTN3As-Fc block, LSEctin-Fc (2  $\mu\text{g}/\text{ml}$ ) was pre-incubated with BTN3A-Fc (20  $\mu\text{g}/\text{ml}$ ) on ice, 60 minutes. For the anti-BTN3A3 (5E08) mAb blockade, breast cancer cells were incubated with anti-BTN3A3 (5E08) mAb or isotype contrl IgG (purified from the normal mouse serum with the same method of anti-BTN3A3 mAb purification) at 10  $\mu\text{g}/\text{ml}$ . After the cells were incubated by the anti-Human LSEctin mAb (CCB059) (on ice, 90 minutes), washed three times in precooling DMEM. Goat anti-mouse IgG (Biolegend) was then

to incubate the cells (on ice, 30 minutes), wash three times. The cells finally were filtered for flow cytometry.

### **Expression cloning**

Human spleen cDNA library (Invitrogen) screening were performed with transfected HEK293 (human embryonic kidney cell line) cell line obtained from the American Type Culture Collection (Manassas, VA), as described for other ligands <sup>3-6</sup>. Before transfection, the library was transformed into E.coli DH5 $\alpha$  Electro-Cells (Takara, Japan) to amplify and get the plasmid concentration more than 1 $\mu$ g/ml to enhance the transfection efficiency (Qiagen). Mammalian Transfection System-Calcium (Promega) was used to transfect the library into HEK293 cells. After adhesion assay, the cells contained positive cDNA library were sorted by the flow cytometry and the positive cDNA were extracted, as described previously <sup>4</sup>. After five successive rounds of sorting, the predominant plasmids from the binding cells were extracted for sequencing.

### **Western blot analysis**

Western blot analysis was performed as described previously <sup>7</sup>. The cells were lysed in buffer (50 mM Tris-HCl, pH 8.0, 150mM NaCl, 5mM EDTA, and 0.5% Nonidet P-40) and centrifuged at 16,000  $\times$ g for 30 minutes to remove debris.

### **RNA extraction and real-time quantitative PCR**

Total RNA was isolated from established human cell lines, patient specimen and human xenografts using the RNeasy Plus Mini Kit (Qiagen). Standard cDNA synthesis reactions were carried out using Reverse Transcription System (Promega) and reverse transcribed products were amplified with the SYBR Green real-time PCR (Toyobo). Expression of *Lsectin* by TAMs or *Btn3a3* by breast cancer cells from human TNBC xenografts or clinical specimens assayed by Realtime-PCR. Realtime-PCR was performed in a real-time PCR machine (iQ5, Biorad) using the primers listed below. The primers of Homo *Btn3a1*, *Btn3a2*, *Btn3a3* and *Lsectin* were purchased from Qiagen.

Results were first normalized to internal control  $\beta$ -actin mRNA. Primers sequences (5' to 3'):

|                      |         |                        |
|----------------------|---------|------------------------|
| Human <i>Sox2</i>    | Forward | GCTCGCAGACCTACATGAAC   |
|                      | Reverse | GGGAGGAAGAGGTAACCACA   |
| Human <i>Oct4</i>    | Forward | GCTCGAGAAGGATGTGGTCC   |
|                      | Reverse | CGTTGTGCATAGTCGCTGCT   |
| Human <i>Nanog</i>   | Forward | TCTGGACACTGGCTGAATCCT  |
|                      | Reverse | CGCTGATTAGGCTCCAACCAT  |
| Human $\beta$ -actin | Forward | GCATCCCCCAAAGTTCACAA   |
|                      | Reverse | AGGACTGGGCCATTCTCCTT   |
| Mouse <i>Lsectin</i> | Forward | GGTGCCCATCTGGTGATTGT   |
|                      | Reverse | CAGTGGCTGAAGTTGAGTGAGG |

### Antibodies and chemicals

The antibodies used in the current study are listed below. Recombinant Human LSECTin-his Protein was purchased from R&D Systems. Insulin, EGF, heparin and hydrocortisone were purchased from Sigma-Aldrich. Basement Membrane Matrix, Growth Factor Reduced was purchased from BD Bioscience. Antibodies used in flow cytometry, Western blot analysis, immunofluorescence and immunoprecipitation:

| Monoclonal Antibody              | Company       | Clone  |
|----------------------------------|---------------|--------|
| Anti- $\beta$ -Actin antibody    | Sigma-Aldrich | AC-74  |
| Anti-Mouse CD16/CD32 Purified    | eBioscience   | 93     |
| Anti-Mouse CD45 FITC             | eBioscience   | 30-F11 |
| Anti-Mouse CD45 PE               | eBioscience   | 30-F11 |
| Anti-Mouse CD45 PerCP-Cyanine5.5 | eBioscience   | 30-F11 |
| Anti-Mouse MHC Class II (I-A) PE | eBioscience   | NIMR-4 |
| Anti-Mouse CD11b PE-Cyanine7     | eBioscience   | M1/70  |
| Anti-Mouse Ly6C APC              | eBioscience   | HK1.4  |
| Anti-Mouse NK1.1 PE              | eBioscience   | PK136  |

|                                              |               |             |
|----------------------------------------------|---------------|-------------|
| Anti-Mouse gamma delta TCR APC               | eBioscience   | eBioGL3     |
| Anti-Human CD45 PE                           | eBioscience   | 2D1         |
| Anti-Human CD31 PE                           | eBioscience   | WM59        |
| Anti-Human CD3 FITC                          | eBioscience   | OKT3        |
| Anti-Human CD19 FITC                         | eBioscience   | HIB19       |
| Anti-Human CD56 FITC                         | eBioscience   | TULY56      |
| Anti-Human CD11b PE-Cyanine7                 | eBioscience   | ICRF44      |
| Anti-Human CD277                             | eBioscience   | eBioBT3.1   |
| Mouse IgG1 $\kappa$ Isotype Control Purified | eBioscience   | P3.6.2.8.1  |
| Mouse IgG2a Isotype Control Purified         | eBioscience   | eBM2a       |
| Anti-Mouse Ly6G APC-Cyanine7                 | BD Bioscience | 1A8         |
| Anti-Human CD14 V500                         | BD Bioscience | M5E2        |
| Anti-Human CD15 PE-CF594                     | BD Bioscience | W6D3        |
| Anti-Mouse CD3 PE-Cyanine5                   | Biolegend     | 145-2C11    |
| Anti-Mouse MHC II PerCP-Cyanine5.5           | Biolegend     | M5/114.15.2 |
| Anti-Human LSECTin                           | Abcam         | EPR13724    |
| Anti-Human CD31                              | Abcam         | P2B1        |
| Anti-Human CD45                              | Abcam         | MEM-28      |
| Anti-Mouse F4/80                             | Abcam         | BM8         |
| Anti-Human CD68                              | Dako          | EBM11       |
| Anti-Human BTN3A3                            | In house      | 5E08        |
| Anti-Human BTN3A3                            | In house      | 4G09        |
| Anti-Human LSECTin APC                       | In house      | CCB059      |
| Anti-Human LSECTin                           | In house      | CCB059      |
| Anti-Human LSECTin                           | In house      | CFD051      |

| <b>Polyclonal Antibody</b>                 | <b>Company</b> | <b>Catalog number</b> |
|--------------------------------------------|----------------|-----------------------|
| Anti-Human BTN3A3 antibody                 | Sigma-Aldrich  | HPA007904             |
| Anti-Mouse IgG APC                         | eBioscience    | 17-4010               |
| Anti-Mouse IgG PE                          | Biolegend      | 405307                |
| Anti-Rabbit IgG PE                         | Biolegend      | 406421                |
| TRITC Conjugated Goat anti-Rabbit IgG(H+L) | ZSGB-BIO       | ZF-0316               |
| FITC Conjugated Goat anti-Mouse IgG(H+L)   | ZSGB-BIO       | ZF-0312               |

|                           |          |   |
|---------------------------|----------|---|
| Rabbit Anti-Mouse LSEctin | In house | — |
|---------------------------|----------|---|

### **Generation of stable cells using lentiviral infection**

The lentivirus were used to knock down or over expression of human BTN3A3. To knock down BTN3A3 expression, the lentivirus was purchased from Genepharma (Suzhou, JS, China). The negative control sequence of shRNA-mediated knockdown in MDA-MB-231 and MDA-MB-468 was TTCTCCGAACGTGTCACGTTTC (NC). The mature antisense sequences were GCCACAGATGGATCTCATATC (sh3) and CCCTTCTGCAACAACCAATCA (sh4). To overexpress BTN3A, the lentiviral-based pHAGE-EF-ZsG-DEST plasmid was used to construct vectors for BTN3A1, BTN3A2, BTN3A3, BTN3A3 (E153D), BTN3A3 (E158K), BTN3A3 (I221T), BTN3A3 (N224S), BTN3A3 ( $\Delta$ IgC), BTN3A3 ( $\Delta$ IgV), BTN3A3(ECD)BTN3A3(ICD). To generate lentivirus, we transfected HEK293T cells with pHAGE-ZsG (for vector control virus), pHage-ZsG-BTN3A1, pHage-ZsG-BTN3A2, pHage-ZsG-BTN3A3, pHage-ZsG-BTN3A3 (E153D), pHage-ZsG-BTN3A3 (E158K), pHage-ZsG-BTN3A3 (I221T), pHage-ZsG-BTN3A3 (N224S), pHage-ZsG-BTN3A3 ( $\Delta$ IgC), pHage-ZsG-BTN3A3 ( $\Delta$ IgV) or pHage-ZsG-BTN3A3(ECD)BTN3A3(ICD) combined with psPAX2 and pMD2.G. Twenty-four hours after transfection, the medium were replaced with fresh medium and then collected at 24 hour intervals. The collected medium containing lentivirus was centrifuged to eliminate cell debris and was filtered through 0.45 $\mu$ m filters. Cells were seeded at 60 % confluence 12 hours before infection, and the medium was replaced with fresh medium containing concentrated lentivirus. After infection for 24 hours, the medium was replaced with fresh medium.

### **Recombinant protein purification**

The recombinant soluble BTN3A-Fc, human LSEctin-Fc, mouse LSEctin-Fc produced by HEK293T grown in chemically defined medium (Invitrogen) was purified with Protein G agarose columns (GE Healthcare), as described previously <sup>8</sup>.

## **Bioinformatics analysis**

The TCGA data set was obtained from the TCGA Data Portal. Patients with incomplete records of mRNA expression or pathology data were excluded. Kaplan-Meier survival curve generation and tests, gene expression comparison across different molecular subtypes and correlation analysis were performed using Prism 5.0 software (GraphPad).

## **Statistical analysis**

No statistical method was used to predetermine sample size. Mice were assigned at random to treatment groups for all mouse studies and, where possible, mixed among cages. For mouse studies, investigators were blinded to the group allocation. Investigators were also blinded when assessing the outcome by immunofluorescence staining, gene expression and sphere-formation. For each data set, the data meet the assumptions of the tests, including normal distribution and homogeneity of variances. Data were analyzed using Prism 5.0 software (Graphpad) and presented as mean values  $\pm$  SEM.

For image quantification and adhesion rate comparison, statistical significance was assayed by unpaired Student's t test. Statistical differences in the sphere-forming assay was determined by unpaired Student's t test. Statistics analysis of tumor growth were by two-way ANOVA and unpaired Student's t test to compare the means. P values were considered significant as follows: \* $P < 0.05$ , \*\* $P < 0.01$ , \*\*\* $P < 0.001$ .

## **Supplementary information references**

- 1 Lu H, Clauser KR, Tam WL *et al.* A breast cancer stem cell niche supported by juxtacrine signalling from monocytes and macrophages. *Nat Cell Biol* 2014; **16**:1105-1117.
- 2 Ruffell B, Au A, Rugo HS, Esserman LJ, Hwang ES, Coussens LM. Leukocyte composition of human breast cancer. *Proc Natl Acad Sci U S A* 2012; **109**:2796-2801.
- 3 Chang C, Lanier LL. Use of cDNA library expression cloning to identify components of heterodimeric receptor complexes. *Methods Mol Biol* 2000; **121**:273-281.
- 4 Hoffman BJ. cDNA expression cloning in mammalian cells. *Curr Protoc Neurosci* 2001; **Chapter 4**:Unit 4 8.



- 5 Zheng J, Umikawa M, Cui C *et al.* Inhibitory receptors bind ANGPTLs and support blood stem cells and leukaemia development. *Nature* 2012; **485**:656-660.
- 6 Hu F, Liu BP, Budel S *et al.* Nogo-A interacts with the Nogo-66 receptor through multiple sites to create an isoform-selective subnanomolar agonist. *J Neurosci* 2005; **25**:5298-5304.
- 7 Marotta LL, Almendro V, Marusyk A *et al.* The JAK2/STAT3 signaling pathway is required for growth of CD44(+)CD24(-) stem cell-like breast cancer cells in human tumors. *J Clin Invest* 2011; **121**:2723-2735.
- 8 Tang L, Yang J, Tang X, Ying W, Qian X, He F. The DC-SIGN family member LSECTin is a novel ligand of CD44 on activated T cells. *Eur J Immunol* 2010; **40**:1185-1191.
